# Supplementary material for: Structure Based Modeling of Small Molecules Binding to the TLR7 by Atomistic Level Simulations
Source: MDPI journal article supplement (doi:10.3390/molecules20058316), 2015-05-08
Supplement: s1 [file s1]

## Supplementary Materials

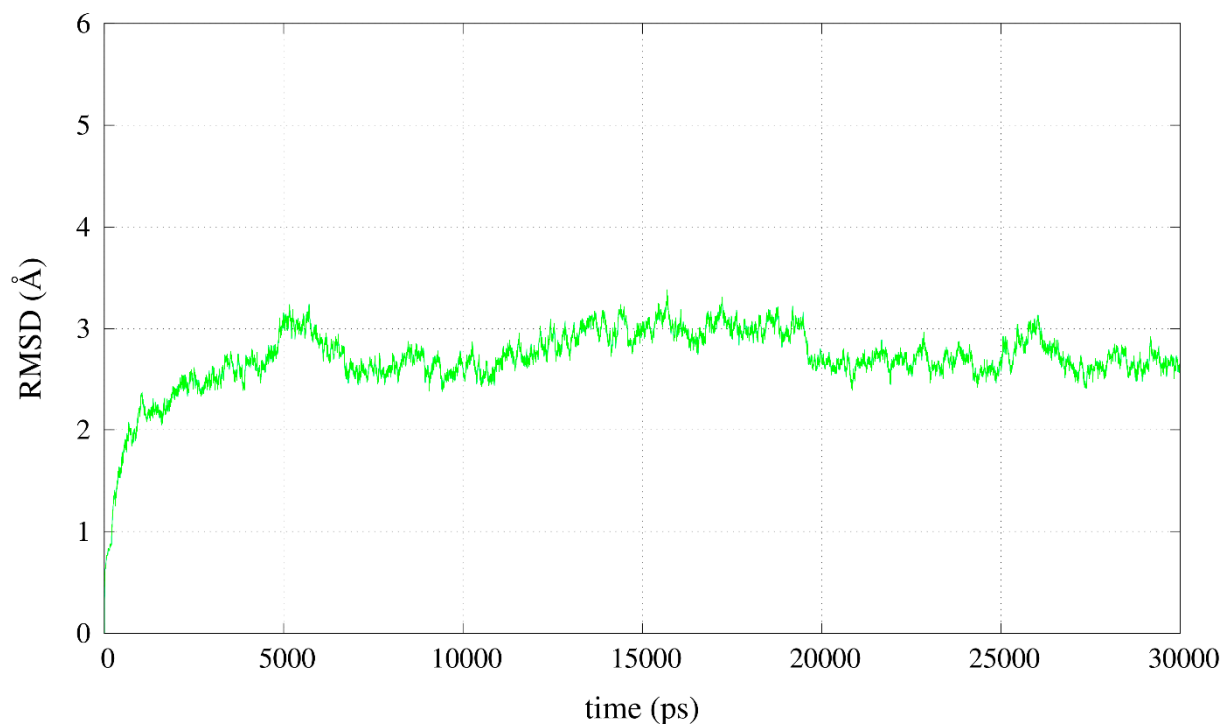

**Figure S1.** RMSD trend for the apo-structure of TLR7.

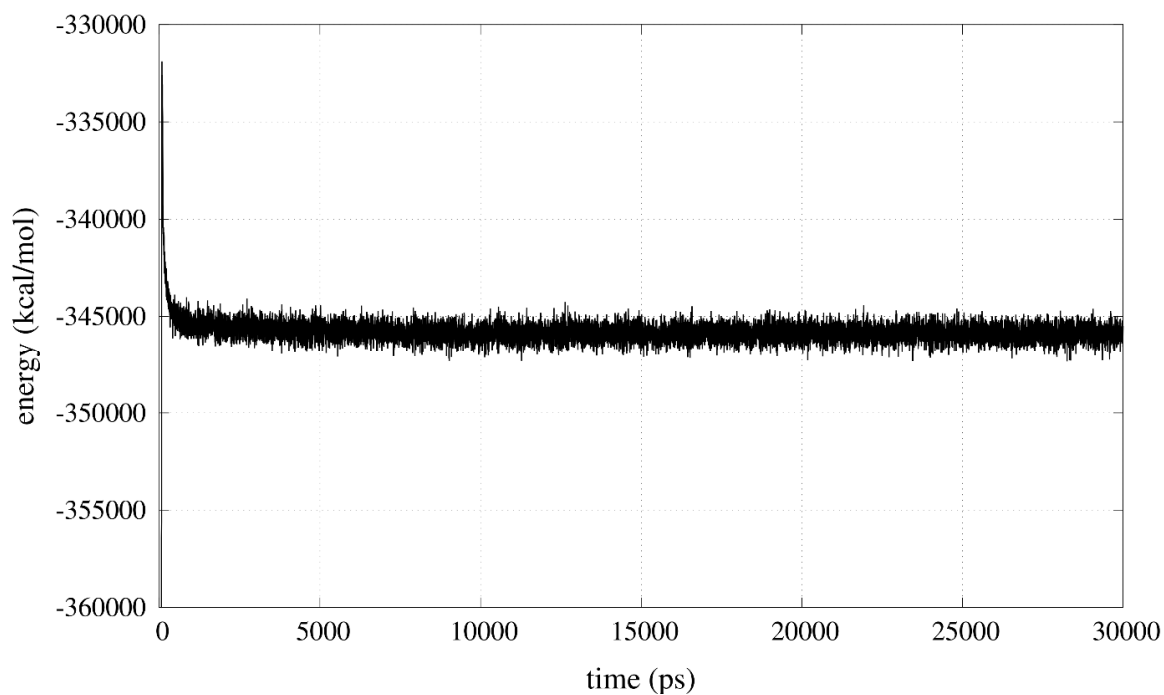

**Figure S2.** Total energy for the apo-structure of TLR7.

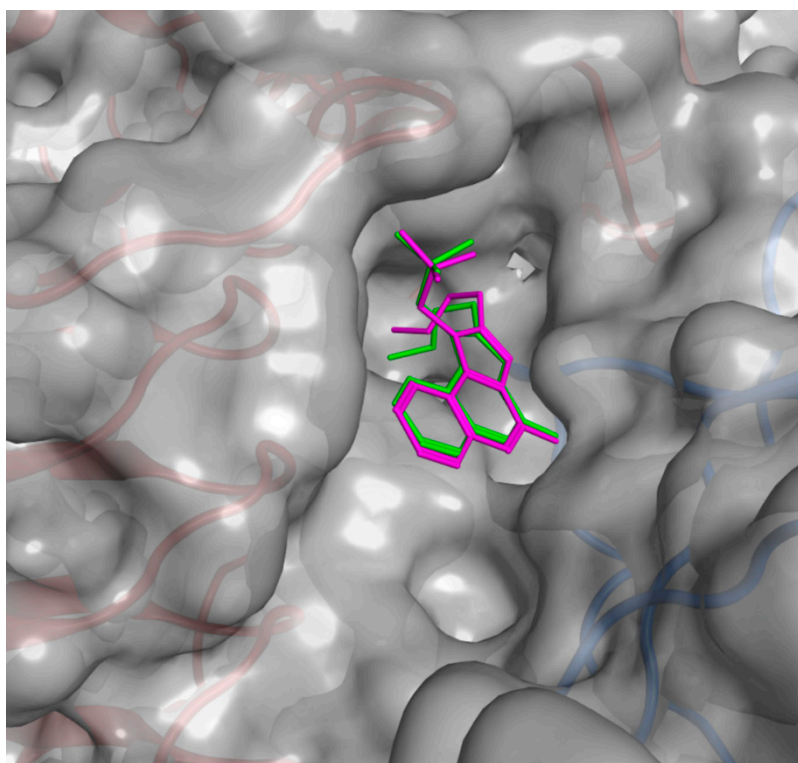

**Figure S3.** Superimposition of crystallographic and docked conformations of R-848 on TLR8. Experimental structure is represented in purple; docking result is depicted in green; pocket surface is represented in gray.

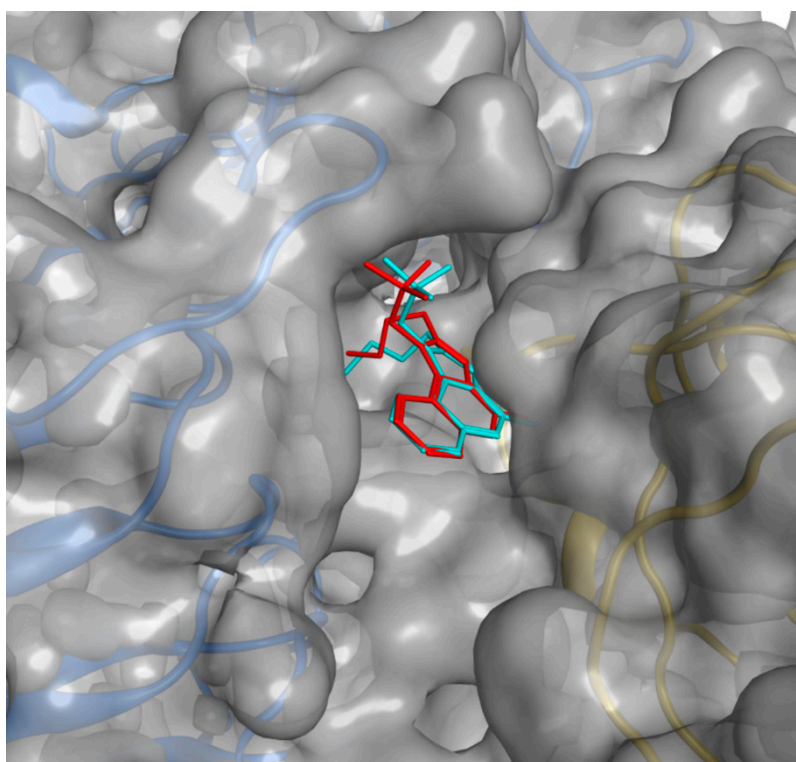

**Figure S4.** Superimposition of docked conformations of R-848 on TLR7 from Autodock and MOE. Autodock structure is represented in red; MOE result is depicted in cyan; pocket surface is represented in gray.

**Table S1.** Results from Autodock are compared with experimental binding energies.

| Compound | Autodock                               |                              |                                | Experimental                       |                      |                                        |
|----------|----------------------------------------|------------------------------|--------------------------------|------------------------------------|----------------------|----------------------------------------|
|          | Binding Energy (kcal/mol) <sup>1</sup> | Size of Cluster <sup>2</sup> | Ligand Efficiency <sup>3</sup> | EC <sub>50</sub> (nM) <sup>4</sup> | SD (nM) <sup>4</sup> | Binding Energy (kcal/mol) <sup>5</sup> |
| R-837    | −7.29                                  | 96                           | −0.41                          | n.a.                               | n.a.                 | n.a.                                   |
| R-848    | −7.79                                  | 56                           | −0.34                          | 607                                | 240                  | −8.53                                  |
| 1V209    | −8.23                                  | 59                           | −0.32                          | n.a.                               | n.a.                 | n.a.                                   |
| 52455    | −8.53                                  | 100                          | −0.37                          | 103                                | 12                   | −9.60                                  |
| 52457    | −6.09                                  | 43                           | −0.28                          | -                                  | -                    | -                                      |
| 52459    | −7.93                                  | 100                          | −0.36                          | -                                  | -                    | -                                      |
| 52542    | −8.06                                  | 96                           | −0.35                          | 353                                | 96                   | −8.86                                  |
| 52587    | −7.10                                  | 41                           | −0.32                          | -                                  | -                    | -                                      |
| 52763    | −8.15                                  | 99                           | −0.37                          | 965                                | 283                  | −8.26                                  |

SD refers to standard deviations. n.a. refers to unavailable data for agonists. - refers to compounds that did not show any activity on TLR7; <sup>1</sup> binding energy of the lowest energetic conformation in the most populated cluster; Autodock error is ~2.5 kcal/mol; <sup>2</sup> size of the most populated cluster (maximal value is 100); <sup>3</sup> calculated as binding energy/number of heavy atoms; <sup>4</sup> from [1]; <sup>5</sup> calculated as  $RT \ln(EC_{50})$ ; see text for more details.

**Table S2.** Relative binding energies resulting from MMGBSA calculations over Molecular Dynamics trajectories.

| Compound | Binding Energy (kcal/mol) | SD (kcal/mol) | Activity |
|----------|---------------------------|---------------|----------|
| R-837    | −31.081                   | 2.530         | yes      |
| R-848    | −40.734                   | 3.986         | yes      |
| 1V209    | −50.251                   | 4.360         | yes      |
| 52455    | −41.136                   | 3.971         | yes      |
| 52457    | −23.592                   | 2.982         | no       |
| 52459    | −22.476                   | 3.265         | no       |
| 52542    | −48.162                   | 3.523         | yes      |
| 52587    | −21.117                   | 4.062         | no       |
| 52763    | −35.550                   | 3.996         | yes      |

SD refers to standard deviations.

**Table S3.** Single residues contributions to MMGBSA binding energies of 1V209, R-837, R-848, 52455, 52459.

| Residue | Binding Energy Contribution (kcal/mol) |        |        |        |        |
|---------|----------------------------------------|--------|--------|--------|--------|
|         | 1V209                                  | R-837  | R-848  | 52455  | 52459  |
| aTHR532 | −0.368                                 | −0.129 | −0.447 | −0.134 | −2.642 |
| aASP555 | −11.297                                | −2.259 | −3.572 | −9.212 | −0.998 |
| aLEU556 | −0.165                                 | −1.438 | −0.969 | −0.084 | −0.142 |
| aLEU557 | −5.259                                 | −4.818 | −4.783 | −4.457 | −0.916 |
| aTYR579 | −0.548                                 | −1.104 | −0.337 | −1.405 | −0.074 |
| aGLY584 | −0.693                                 | −0.269 | −1.016 | −1.006 | −0.383 |
| aILE585 | −5.078                                 | −4.426 | −4.362 | −4.926 | −1.513 |
| aTHR586 | −6.570                                 | −5.101 | −5.693 | −5.477 | −0.347 |
| bPHE349 | −0.869                                 | −0.052 | −0.763 | −1.004 | −0.030 |
| bPHE351 | −2.428                                 | −2.125 | −3.268 | −2.514 | −0.221 |
| bVAL355 | −1.422                                 | −0.408 | −1.561 | −0.990 | −2.050 |
| bTYR356 | −4.137                                 | −0.644 | −2.259 | −2.771 | −4.980 |
| bGLY379 | −0.676                                 | −0.082 | −0.859 | −0.829 | −0.051 |
| bVAL381 | −2.350                                 | −1.340 | −2.586 | −2.573 | −1.112 |
| bTHR406 | −0.833                                 | −0.124 | −0.837 | −1.011 | −0.095 |
| bASN407 | −0.273                                 | −0.109 | −0.364 | −0.288 | −0.115 |
| bPHE408 | −6.264                                 | −2.719 | −5.596 | −5.303 | −1.897 |
| bLYS432 | −1.908                                 | −0.267 | −1.958 | −2.225 | −1.117 |

a and b suffixes in the residues column refer respectively to the first or the second monomer of TLR7.

## References

1. Forsbach, A.; Müller, C.; Montino, C.; Kritzler, A.; Nguyen, T.; Weeratna, R.; Jurk, M.; Vollmer, J. Negative regulation of the type I interferon signaling pathway by synthetic Toll-like receptor 7 ligands. *J. Interferon Cytokine Res.* **2012**, *32*, 254–268.
